# Supplementary material for: Association between asymptomatic hyperuricemia and risk of arthritis, findings from a US National Survey 2007–2018
Source: PubMed Central journal article supplement — BMJ Open. 2024 Feb 12;14(2):e074391. doi: 10.1136/bmjopen-2023-074391 (PMC10862310; doi:10.1136/bmjopen-2023-074391), 2024-02-12
Supplement: bmjopen-2023-074391supp001.pdf [file bmjopen-2023-074391supp001.pdf]

## Supplementary materials

**The association between asymptomatic hyperuricemia and risk of arthritis, findings from a US National Survey 2007-2018**

### Supplementary Tables

**sTable1.** Characteristics of participants included in this study

**sTable2.** Subgroup analysis of the association of arthritis subtype (RA, OA, Other and Unspecified) and AH.

Supplementary Table 1. Characteristics of participants included in this study

|                    | 2007-2008          | 2009-2010          | 2011-2012          | 2013-2014          | 2015-2016          | 2017-2018          | p     |
|--------------------|--------------------|--------------------|--------------------|--------------------|--------------------|--------------------|-------|
| N*                 | 2330               | 2528               | 2229               | 2367               | 2067               | 2126               |       |
| Uricacid           |                    |                    |                    |                    |                    |                    | 0.438 |
| NA                 | 83.65(81.60,85.69) | 84.50(82.38,86.62) | 84.71(82.87,86.64) | 83.55(81.95,85.15) | 84.13(82.09,86.17) | 83.61(80.70,86.53) |       |
| AH                 | 16.35(14.01,18.40) | 15.50(13.38,17.62) | 15.29(13.46,17.13) | 16.45(14.85,18.05) | 15.87(13.83,17.91) | 16.39(13.47,19.30) |       |
| Gender             |                    |                    |                    |                    |                    |                    | 0.279 |
| Male               | 47.25(45.60,48.89) | 45.56(43.56,47.55) | 47.90(45.04,50.75) | 47.69(45.61,49.77) | 47.36(45.31,49.42) | 48.09(44.95,51.22) |       |
| Female             | 52.75(51.11,54.40) | 54.44(52.45,56.44) | 52.10(49.25,54.96) | 52.31(50.23,54.39) | 52.64(50.58,54.69) | 51.91(48.78,55.05) |       |
| Age                |                    |                    |                    |                    |                    |                    | <0.01 |
| 20-29              | 19.13(16.42,21.85) | 19.35(16.80,21.90) | 18.23(15.01,21.45) | 18.40(15.73,21.08) | 16.67(14.61,18.72) | 19.86(16.81,22.90) |       |
| 30-39              | 18.20(15.96,20.43) | 16.98(14.62,19.35) | 18.53(15.67,21.39) | 17.24(15.16,19.31) | 15.59(14.04,17.15) | 18.76(15.92,21.60) |       |
| 40-49              | 20.97(17.50,24.44) | 21.50(19.52,23.49) | 18.86(15.20,22.52) | 19.43(16.80,22.07) | 18.56(15.67,21.45) | 15.71(13.13,18.28) |       |
| 50-59              | 19.29(16.77,21.80) | 19.37(16.98,21.77) | 19.08(17.07,21.08) | 18.17(15.58,20.76) | 18.81(17.09,20.54) | 19.93(16.84,23.02) |       |
| 60-69              | 11.44(9.42,13.46)  | 11.18(9.90,12.46)  | 14.03(12.10,15.96) | 14.71(12.03,17.38) | 19.21(16.43,22.00) | 14.81(11.45,18.16) |       |
| 70+                | 10.98(9.65,12.30)  | 11.60(10.10,13.10) | 11.26(9.65,12.88)  | 12.05(10.37,13.73) | 11.16(9.36,12.96)  | 10.95(8.93,12.97)  |       |
| Race/Ethnicity     |                    |                    |                    |                    |                    |                    | <0.01 |
| Other Race         | 13.87(10.43,17.31) | 16.55(11.72,21.38) | 15.80(11.44,20.16) | 16.88(12.75,21.02) | 17.24(13.58,20.90) | 19.91(16.40,23.42) |       |
| Hispanic           | 5.09(2.60,7.58)    | 5.84(2.94,8.74)    | 6.74(3.84,9.64)    | 5.67(2.34,8.61)    | 6.74(3.88,9.59)    | 6.86(5.00,8.72)    |       |
| Non-Hispanic White | 70.37(63.63,77.11) | 66.91(60.23,73.59) | 68.04(61.22,74.87) | 67.07(60.01,74.13) | 65.74(57.81,73.66) | 61.96(57.22,66.69) |       |

|                           |                    |                    |                    |                    |                    |                    |       |
|---------------------------|--------------------|--------------------|--------------------|--------------------|--------------------|--------------------|-------|
| Non-Hispanic Black        | 10.67(6.63,14.70)  | 10.70(8.67,12.72)  | 9.42(5.94,12.90)   | 10.37(7.68,13.07)  | 10.29(5.86,14.71)  | 11.27(7.61,14.93)  |       |
| Education Level           |                    |                    |                    |                    |                    |                    | <0.01 |
| High school or below      | 43.02(37.88,48.16) | 41.31(37.13,45.52) | 37.42(31.97,42.87) | 36.42(30.79,42.04) | 36.46(30.23,42.68) | 39.61(36.03,43.19) |       |
| Some college              | 28.45(26.32,30.58) | 29.63(26.71,32.56) | 31.10(27.90,34.30) | 32.90(29.91,35.90) | 31.18(27.20,35.16) | 29.91(25.07,34.76) |       |
| College graduate or above | 28.53(24.06,33.00) | 29.05(25.76,32.33) | 31.48(25.02,37.94) | 30.68(26.29,35.07) | 32.36(25.35,39.37) | 30.47(24.72,36.23) |       |
| BMI                       |                    |                    |                    |                    |                    |                    | <0.01 |
| Normal                    | 33.39(31.60,35.19) | 32.13(28.74,35.52) | 31.68(27.63,35.73) | 31.24(28.78,33.70) | 27.17(23.38,30.96) | 29.29(25.52,33.05) |       |
| Overweight                | 35.11(32.97,37.26) | 32.96(30.44,35.48) | 33.36(31.12,35.60) | 33.31(30.91,35.70) | 32.66(31.03,34.28) | 31.53(29.18,33.8)  |       |
| Obesity                   | 31.49(28.61,34.37) | 34.91(32.02,37.79) | 34.96(31.50,38.42) | 35.45(33.20,37.70) | 40.17(36.34,44.00) | 39.18(35.37,43.00) |       |
| Blood pressure            |                    |                    |                    |                    |                    |                    | <0.01 |
| Hypertension              | 40.92(37.47,44.37) | 40.38(36.47,44.30) | 45.82(41.97,49.68) | 43.84(39.24,48.43) | 44.44(40.49,48.40) | 46.99(43.71,50.28) |       |
| Normal                    | 59.08(55.63,62.53) | 59.62(55.70,63.53) | 54.18(50.32,58.03) | 56.16(51.57,60.76) | 55.56(51.60,59.51) | 53.01(49.72,56.29) |       |
| PIR                       |                    |                    |                    |                    |                    |                    | <0.01 |
| Low income                | 19.38(16.16,22.61) | 21.90(19.24,24.56) | 24.29(20.21,28.38) | 25.33(19.07,31.59) | 19.64(16.45,22.82) | 20.01(17.46,22.56) |       |
| Middle income             | 33.99(30.47,37.52) | 37.50(33.75,41.26) | 35.70(31.24,40.17) | 33.69(30.70,36.68) | 37.50(34.14,40.87) | 37.61(33.36,41.86) |       |
| High income               | 46.62(41.80,51.44) | 40.60(36.83,44.36) | 40.00(33.29,46.72) | 40.98(34.20,47.76) | 42.86(37.83,47.88) | 42.38(37.89,46.88) |       |
| Smoking                   |                    |                    |                    |                    |                    |                    | 0.01  |
| Current                   | 21.61(18.39,24.83) | 18.98(17.51,20.45) | 20.06(16.75,23.36) | 19.50(15.86,23.14) | 18.73(15.50,21.97) | 17.47(14.68,20.27) |       |
| Before                    | 24.99(22.25,27.73) | 24.21(20.55,27.87) | 23.04(20.16,25.92) | 23.68(20.64,26.72) | 26.46(22.62,30.31) | 24.90(22.47,27.32) |       |
| Never                     | 53.40(49.73,57.07) | 56.80(53.00,60.61) | 56.90(53.76,60.05) | 56.82(52.86,60.78) | 54.81(50.57,59.04) | 57.63(54.64,60.62) |       |

|                           |                    |                    |                    |                    |                    |                    |  |       |
|---------------------------|--------------------|--------------------|--------------------|--------------------|--------------------|--------------------|--|-------|
| PAL                       |                    |                    |                    |                    |                    |                    |  | <0.01 |
| Moderate activities       | 58.98(55.40,62.57) | 62.32(59.17,65.48) | 61.71(57.96,65.46) | 62.05(59.40,64.70) | 57.56(54.23,60.90) | 52.20(49.94,54.47) |  |       |
| Vigorous activities       | 41.02(37.43,44.60) | 37.68(34.52,40.83) | 38.29(34.54,42.04) | 37.95(35.30,40.60) | 42.44(39.10,45.77) | 47.80(45.53,50.06) |  |       |
| Diabetes                  |                    |                    |                    |                    |                    |                    |  | <0.01 |
| Yes                       | 10.17(8.32,12.03)  | 9.47(8.21,10.74)   | 10.20(8.31,12.09)  | 10.34(8.83,11.84)  | 12.25(9.95,14.55)  | 12.14(9.78,14.49)  |  |       |
| No                        | 89.83(87.97,91.68) | 90.53(89.26,91.79) | 89.80(87.91,91.69) | 89.66(88.16,91.17) | 87.75(85.45,90.05) | 87.86(85.51,90.22) |  |       |
| With or without arthritis |                    |                    |                    |                    |                    |                    |  | <0.01 |
| No arthritis              | 74.05(70.64,77.47) | 74.90(72.43,77.38) | 77.19(73.85,80.53) | 75.09(72.40,77.78) | 73.16(70.09,76.24) | 74.47(70.56,78.38) |  |       |
| Arthritis                 | 25.95(22.53,29.36) | 25.10(22.62,27.57) | 22.81(19.47,26.15) | 24.91(22.22,27.60) | 26.84(23.76,29.91) | 25.53(21.62,29.44) |  |       |
| OA                        | 8.70(6.56,10.85)   | 9.56(8.30,10.82)   | 11.30(8.92,13.68)  | 13.88(11.87,15.89) | 12.92(10.99,14.86) | 12.44(9.32,15.55)  |  |       |
| RA                        | 3.57(2.87,4.27)    | 4.11(3.18,5.04)    | 3.90(2.78,5.02)    | 3.09(2.15,4.02)    | 3.59(2.53,4.64)    | 4.04(2.82,5.25)    |  |       |
| Other                     | 3.54(2.56,4.52)    | 3.64(2.80,4.47)    | 2.88(1.39,4.37)    | 2.98(2.05,3.91)    | 3.33(1.66,5.01)    | 3.04(1.78,4.30)    |  |       |
| Unspecified               | 10.13(8.22,12.05)  | 7.79(6.41,9.17)    | 4.73(3.14,6.33)    | 4.96(4.03,5.89)    | 6.99(5.25,8.73)    | 6.02(4.66,7.37)    |  |       |
| Cholesterol(mg/dl)†       | 194.90±40.98       | 195.00±39.66       | 191.78±39.95       | 188.44±39.94       | 190.31±41.06       | 186.04±40.55       |  | <0.01 |
| LDL(mg/dl)†               | 115.60±35.83       | 116.32±34.82       | 114.41±34.74       | 111.74±35.10       | 112.89±35.82       | 110.72±35.69       |  | <0.01 |
| HDL(mg/dl)†               | 54.15±15.40        | 54.40±15.95        | 53.78±14.93        | 54.58±16.11        | 55.97±17.56        | 54.02±15.74        |  | <0.01 |
| Triglyceride(mg/dl)†      | 125.72±66.36       | 121.43±64.17       | 117.95±64.42       | 110.61±65.08       | 107.26±63.05       | 106.48±63.30       |  | <0.01 |
| Creatinine(mg/dl)†        | 123.56±74.93       | 124.01±74.60       | 125.83±78.25       | 119.58±74.02       | 126.23±77.54       | 136.33±83.94       |  | <0.01 |
| Albumin(mg/dl)†           | 58.18±663.81       | 33.09±182.80       | 37.78±211.82       | 40.30±250.06       | 51.49±338.92       | 56.01±379.49       |  | 0.105 |

\*N represents unweighted number, and the remaining values are weighted values using NHANES MEC examination weight.

†Figures are expressed as mean ± standard error, other figures are expressed as percent (95% confidence intervals).

BMI: body mass index; PIR: poverty income ratio; PAL: Physical activity level; LDL: Low-density lipoprotein; HDL: High-density lipoprotein; RA: Rheumatoid arthritis; OA: Osteoarthritis; AH: asymptomatic hyperuricemia (serum urate > 6.8 mg/dL with no gout); NA: no-hyperuricemia.

Supplementary Table 2. Subgroup analysis of the association of arthritis subtype (RA, OA, Other and Unspecified) and AH

|        | OA (OR,95%, P)      | RA (OR,95%, P)       | Other (OR,95%, P)   | Unspecified (OR,95%, P) |
|--------|---------------------|----------------------|---------------------|-------------------------|
| Gender |                     |                      |                     |                         |
| Male   | 1                   | 1                    | 1                   | 1                       |
| Female | 1.35(1.14,1.60)0.00 | 1.08(0.83,1.41)0.59  | 1.00(0.78,1.29)1.00 | 0.99(0.82,1.20)0.96     |
| Age    |                     |                      |                     |                         |
| 20-29  | 1                   | 1                    | 1                   | 1                       |
| 30-39  | 0.36(0.27,0.49)0.00 | 0.36(0.24,0.54)0.00  | 0.35(0.23,0.55)0.00 | 0.38(0.27,0.53)0.00     |
| 40-49  | 0.80(0.62,1.04)0.97 | 0.99(0.71,1.38)0.96  | 0.88(0.64,1.21)0.44 | 0.95(0.70,1.30)0.74     |
| 50-59  | 2.16(1.72,2.72)0.00 | 2.12(1.50,3.00)0.000 | 1.35(1.00,1.83)0.51 | 1.90(1.44,2.49)0.00     |
| 60-69  | 4.18(3.26,5.35)0.00 | 3.34(2.50,4.46)0.000 | 1.69(1.13,2.53)0.01 | 2.70(1.92,3.78)0.00     |
| 70+    | 5.50(4.18,7.22)0.00 | 4.57(3.40,6.15)0.000 | 1.51(0.99,2.33)0.06 | 4.24(3.16,5.69)0.00     |

RA: rheumatoid arthritis; OA: osteoarthritis; AH: asymptomatic hyperuricemia

All data were adjusted for gender, age, race, BMI, education level and poverty to income ratio, hypertension, ever cigarette smoking and diabetes.
